# Supplementary material for: Replication and cross-validation of type 2 diabetes subtypes based on clinical variables: an IMI-RHAPSODY study
Source: Springer Nature journal article supplement (doi:10.1007/s00125-021-05490-8), 2021-06-10
Supplement: MOESM1 [file 19247576]

## ESM Tables

**ESM Table 1 Correlation between HOMA2-B, HOMA2-IR and C-peptide, HDL-cholesterol in DCS and ANDIS.**

| <b>HOMA measure</b> | <b>Var</b>      | <b>Cohort</b> | <b><math>\rho</math></b> |
|---------------------|-----------------|---------------|--------------------------|
| HOMA2-IR            | C-peptide       | DCS           | 0.98                     |
|                     |                 | ANDIS         | 0.93                     |
| HOMA2-B             | C-peptide       | DCS           | 0.63                     |
|                     |                 | ANDIS         | 0.62                     |
| HOMA2-IR            | HDL-cholesterol | DCS           | -0.22                    |
|                     |                 | ANDIS         | -0.27                    |
| HOMA2-B             | HDL-cholesterol | DCS           | -0.10                    |
|                     |                 | ANDIS         | -0.05                    |

Correlation coefficient based on spearman's Rho.

**ESM Table 2 Sensitivity and specificity of the cross-validation of clusters in other studies.**

| Group  | Sensitivity        | Specificity        | Cohort  | Centres |
|--------|--------------------|--------------------|---------|---------|
| 1/SIDD | 96.22[94.98-97.23] | 98.62[98.3-98.89]  | GoDARTS | ANDIS   |
| 1/SIDD | 97.06[94.8-98.52]  | 97.32[96.63-97.91] | ANDIS   | DCS     |
| 1/SIDD | 85.64[83.52-87.59] | 99.63[99.45-99.77] | DCS     | ANDIS   |
| 1/SIDD | 88.78[86.61-90.72] | 98.59[98.21-98.92] | ANDIS   | GoDARTS |
| 1/SIDD | 77.57[74.79-80.18] | 99.19[98.88-99.43] | DCS     | GoDARTS |
| 1/SIDD | 97.06[94.8-98.52]  | 96.36[95.56-97.04] | GoDARTS | DCS     |
| 2/SIRD | 92.29[90.05-94.15] | 92[91.33-92.64]    | GoDARTS | ANDIS   |
| 2/SIRD | 36.05[32.32-39.91] | 94.43[93.41-95.33] | ANDIS   | DCS     |
| 2/SIRD | 68.57[64.99-72]    | 82.75[81.83-83.65] | DCS     | ANDIS   |
| 2/SIRD | 56.19[53.02-59.33] | 99.29[99-99.52]    | ANDIS   | GoDARTS |
| 2/SIRD | 83.42[80.94-85.7]  | 89.67[88.75-90.54] | DCS     | GoDARTS |
| 2/SIRD | 64.26[60.41-67.99] | 94.25[93.23-95.17] | GoDARTS | DCS     |
| 3/MOD  | 76.01[73.93-78]    | 98.45[98.1-98.75]  | GoDARTS | ANDIS   |
| 3/MOD  | 73.85[69.84-77.57] | 85.16[83.69-86.55] | ANDIS   | DCS     |
| 3/MOD  | 54.96[52.58-57.32] | 95.73[95.18-96.24] | DCS     | ANDIS   |
| 3/MOD  | 93.21[91.53-94.65] | 92.72[91.91-93.46] | ANDIS   | GoDARTS |
| 3/MOD  | 62.87[59.88-65.78] | 96.27[95.67-96.81] | DCS     | GoDARTS |
| 3/MOD  | 74.23[70.24-77.94] | 91.62[90.44-92.69] | GoDARTS | DCS     |
| 4/MD   | 66.15[64.3-67.96]  | 91.53[90.71-92.3]  | GoDARTS | ANDIS   |
| 4/MD   | 51.04[47.65-54.42] | 74.46[72.53-76.32] | ANDIS   | DCS     |
| 4/MD   | 40.82[38.93-42.73] | 81.04[79.91-82.13] | DCS     | ANDIS   |
| 4/MD   | 78.14[75.95-80.21] | 83.13[81.93-84.27] | ANDIS   | GoDARTS |
| 4/MD   | 67.81[65.37-70.17] | 86.96[85.88-87.99] | DCS     | GoDARTS |
| 4/MD   | 66.74[63.5-69.88]  | 87.83[86.35-89.2]  | GoDARTS | DCS     |
| 5/MDH  | 92.75[91.15-94.13] | 94.18[93.57-94.74] | GoDARTS | ANDIS   |
| 5/MDH  | 73.33[69.45-76.97] | 98.54[97.98-98.98] | ANDIS   | DCS     |
| 5/MDH  | 92.91[91.33-94.28] | 92.71[92.03-93.34] | DCS     | ANDIS   |
| 5/MDH  | 76.02[73.29-78.61] | 98.19[97.76-98.56] | ANDIS   | GoDARTS |
| 5/MDH  | 89.47[87.43-91.28] | 96.36[95.77-96.89] | DCS     | GoDARTS |
| 5/MDH  | 85.41[82.19-88.24] | 97.62[96.93-98.19] | GoDARTS | DCS     |

SIDD, Severe Insulin-Deficient Diabetes; SIRD, Severe Insulin-Resistant Diabetes cluster; MOD, Mild Obesity-related Diabetes; MD, Mild diabetes; MDH, Mild diabetes with high HDL-cholesterol.

## ESM Figures

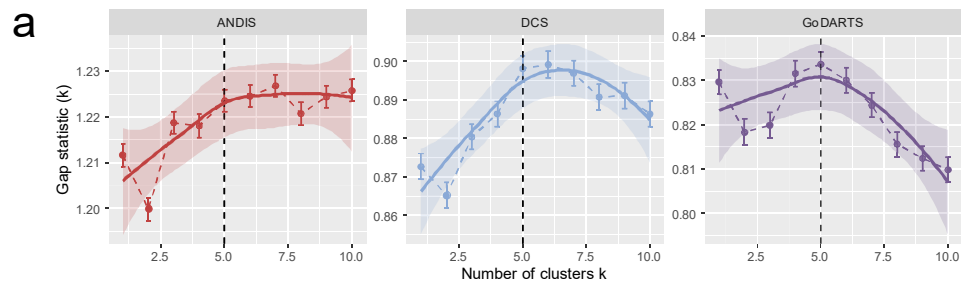

**b**

| Clustering RHAPSODY | Clustering Ahlqvist et al (Lancet) |            |              |              | Sensitivity     | Specificity     |                 |                 |
|---------------------|------------------------------------|------------|--------------|--------------|-----------------|-----------------|-----------------|-----------------|
|                     | 2/SIDD                             | 3/SIRD     | 4/MOD        | 5/MARD       |                 |                 |                 |                 |
| MDH                 | 59<br>1.1                          | 39<br>0.7  | 52<br>1      | 733<br>13.6  | 79.1[77.5-80.6] | 97.7[97.1-98.3] |                 |                 |
| MD                  | 116<br>2.2                         | 269<br>5   | 54<br>1      | 1490<br>27.7 |                 |                 |                 |                 |
| MOD                 | 102<br>1.9                         | 130<br>2.4 | 1048<br>19.5 | 20<br>0.4    |                 |                 | 80.6[78.4-82.7] | 96.4[95.8-97.0] |
| SIRD                | 17<br>0.3                          | 464<br>8.6 | 13<br>0.2    | 8<br>0.1     |                 |                 | 92.4[89.7-94.6] | 90.7[89.9-91.5] |
| SIDD                | 690<br>12.8                        | 14<br>0.3  | 27<br>0.5    | 30<br>0.6    |                 |                 | 90.7[88.4-92.6] | 93.6[92.9-94.3] |

**ESM Figure 1 GAP statistic and comparison to clusters based on HOMA2 measures** **a.** Number of clusters versus the GAP statistic in DCS, GoDARTS and ANDIS. The most optimal number of clusters was at five clusters indicated by the dotted line. **b.** Comparison of clustering in ANDIS in the current study versus those identified in Ahlqvist et al.[1]. Numbers on the diagonal represent the absolute overlap (upper number) and the percentage (lower number). In the right panel, the sensitivity and specificity are given with 95% confidence intervals. SIDD, Severe Insulin-Deficient Diabetes; SIRD, Severe Insulin-Resistant Diabetes cluster; MOD, Mild Obesity-related Diabetes; MD, Mild diabetes; MDH, Mild diabetes with high HDL-cholesterol.

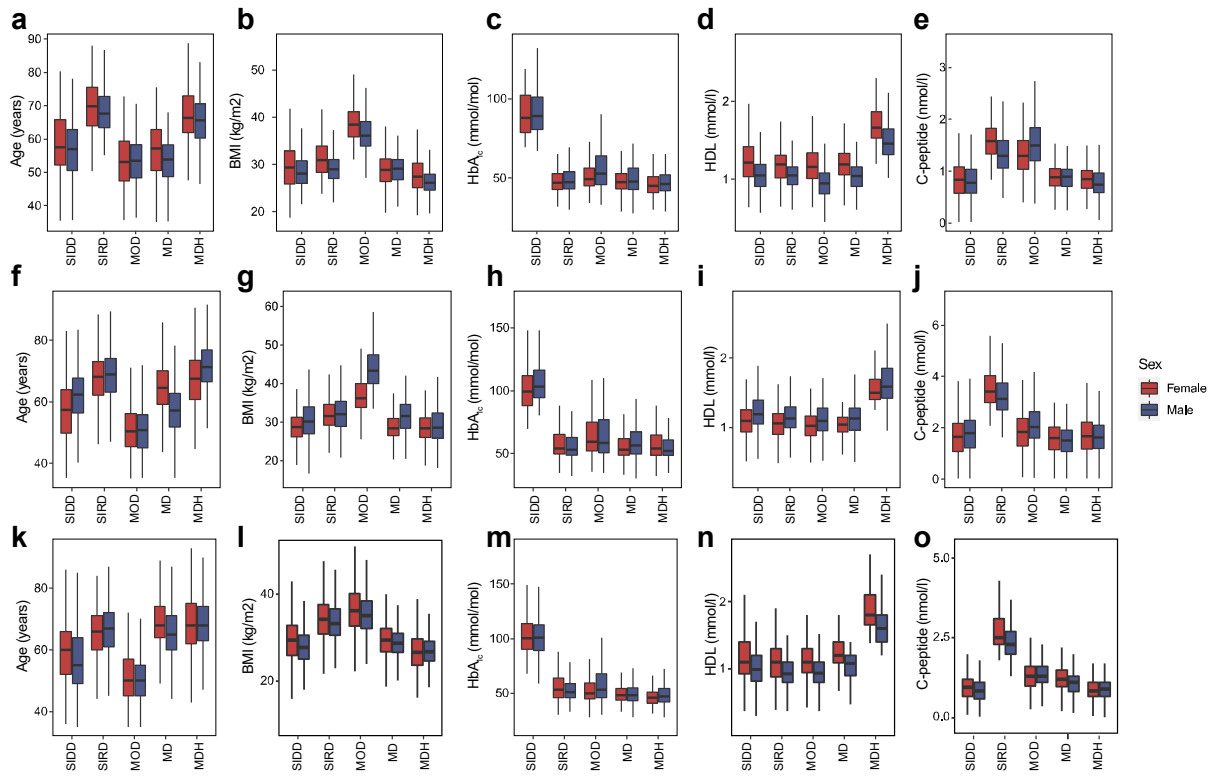

**ESM Figure 2 Characteristics of the clusters for males and females separate.** **a.** Characteristics of the five clusters across three cohorts DCS (**a-e**), GoDARTS (**f-j**) and ANDIS (**k-o**). X-axis, cluster. Y-axis, age (**a, f, k**), BMI (**b, g, l**), HbA<sub>1c</sub> (**c, h, m**), HDL-cholesterol (**d, i, n**), and C-peptide (**e, j, o**). SIDD, Severe Insulin-Deficient Diabetes; SIRD, Severe Insulin-Resistant Diabetes cluster; MOD, Mild Obesity-related Diabetes; MD, Mild diabetes; MDH, Mild diabetes with high HDL-cholesterol. Red females, blue males.

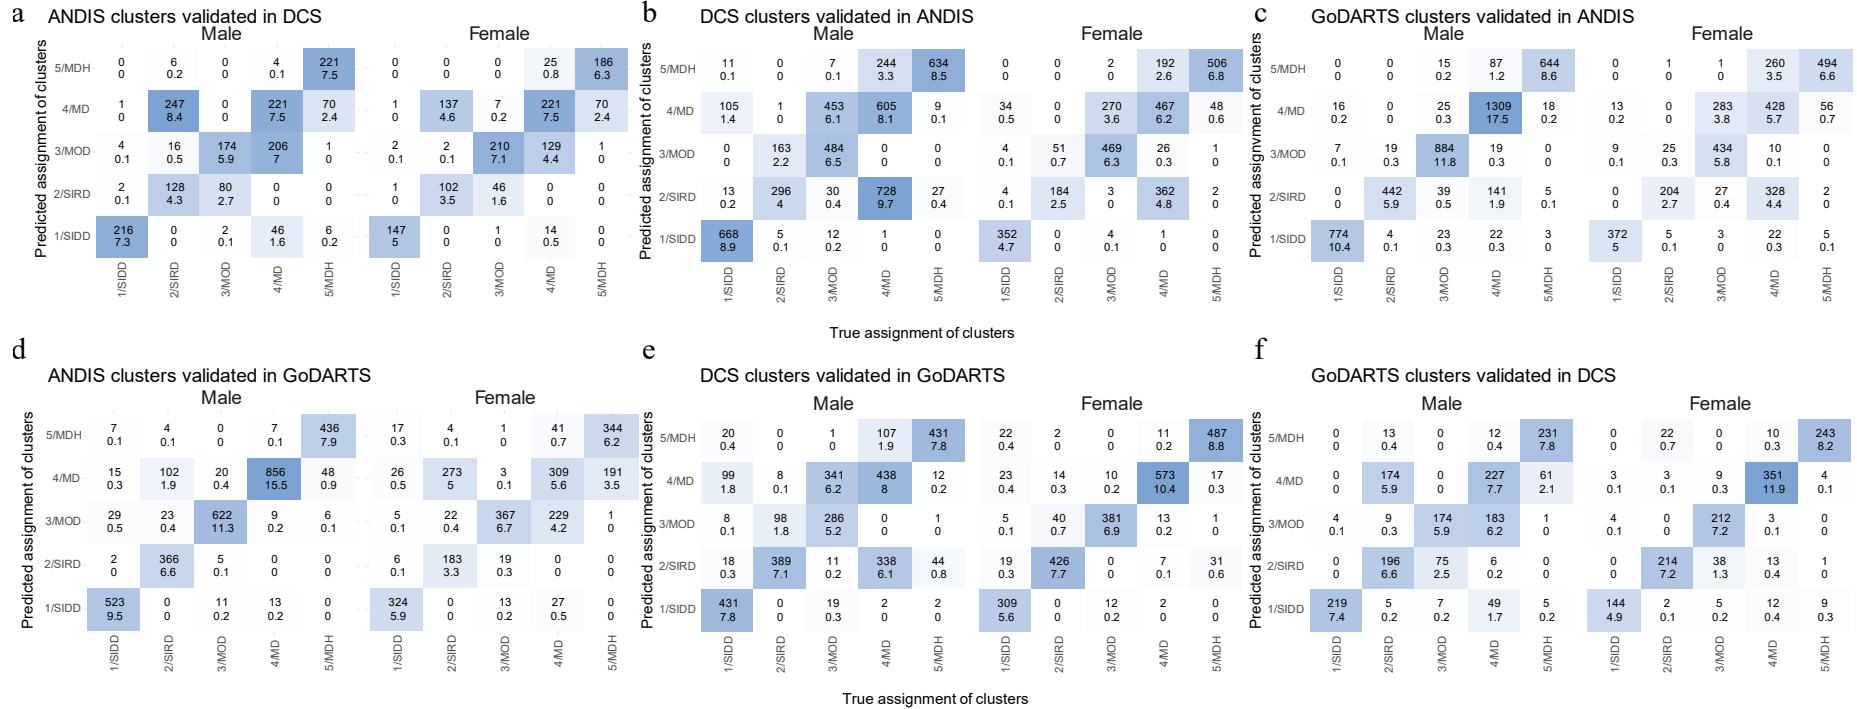

**ESM Figure 3 All pairwise comparisons of identified clusters versus predicted clusters.** Top number in each cell represents the absolute overlap, the bottom number the percentage of individuals. Individuals were assigned to a cluster in cohort A based on the cluster centres of cohort B and compared to the clusters identified in the cohort A. This resulted in the following combinations: **a** clusters identified in DCS based on ANDIS centres **b** clusters identified in ANDIS based on DCS centres **c** clusters identified in ANDIS based on GoDARTS centres **d** clusters identified in GoDARTS based on ANDIS centres **e** clusters identified in GoDARTS based on DCS centres **f** clusters identified in DCS based on GoDARTS centres. SIDD, Severe Insulin-Deficient Diabetes; SIRD, Severe Insulin-Resistant Diabetes cluster; MOD, Mild Obesity-related Diabetes; MD, Mild diabetes; MDH, Mild diabetes with high HDL-cholesterol.

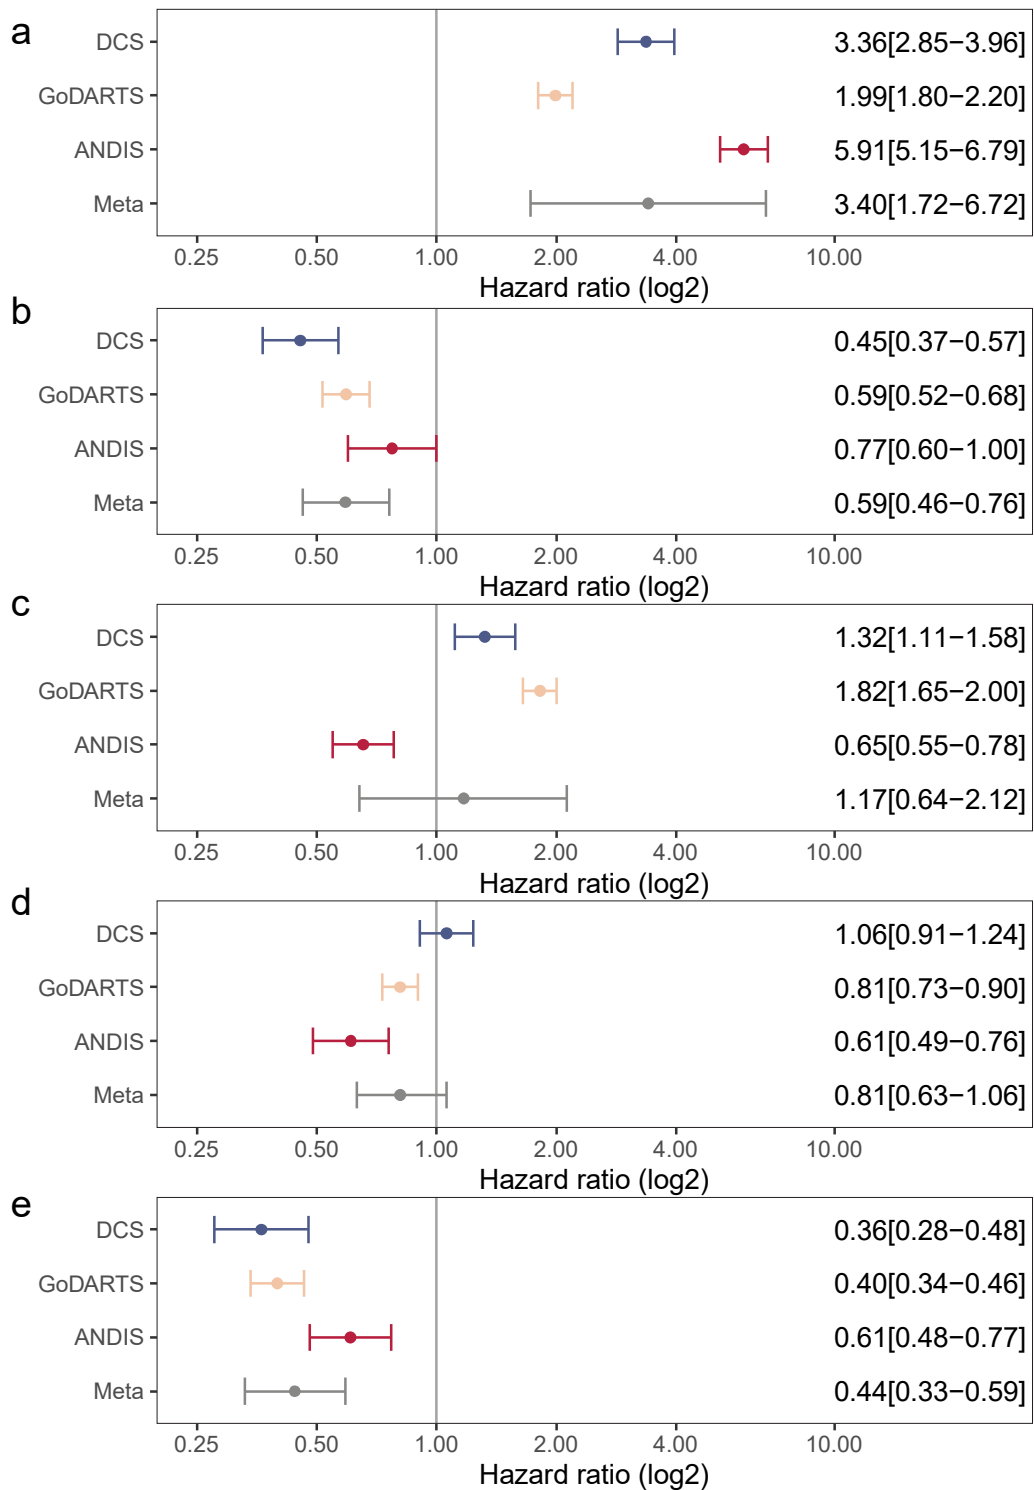

**ESM Figure 4 Hazard for time to insulin requirement across clusters. a SIDD, b SIRD, c MOD, d MD, e MDH.** X-axis, hazard ratio, y-axis cluster. Numbers in panels represent hazards with 95% confidence intervals.
